# Supplementary material
Source: publisher figshare collection journal article supplement (https://wiley.figshare.com/articles/dataset/_/3521648)
Supplement: Supplementary file 1 [file 1]

APPENDIX 1. Fruit characteristics and distribution at sites of plant species. Species names follow Beadle, Evans and Carolin (1984). List is alphabetical by genus but not otherwise sorted. 'Disp. type' means dispersal morphology (see text): 1 = no special morphology, 2 = air-resistance, 3 = vertebrate-adapted fleshy fruit, 4 = ant-adapted food body, 5 = both ballistic and ant-adapted, 6 = ballistic, 7 = uncertain, 8 = exozoochore, 9 = both vertebrate and ant-adapted. Growth forms: 1 = herbs and shrubs usually less than 50 cm tall; 2 = shrubs 50-200 cm tall; 3 = shrubs growing to more than 2 m tall, and trees; 4 = climbers, twiners and vines. Weights $\pm$ s.d. of whole diaspores are based on minimum of 5 mature fruits unless otherwise noted. Weights were measured to three significant figures and are given in mg. The components are 'disp struc' -- structures clearly functioning to procure dispersal; embryo and endosperm - - tissues providing metabolic reserve for the developing seedling; and 'other struc' -- any tissues not in either of the other categories, for example the testa which could not be clearly attributed either to a dispersal adaptation or to an establishment adaptation. Oven-dry weight is given as a percentage of fresh weight for each of these components. Cases when there were multiple embryos within a diaspore, and other complications, are dealt with in the footnotes. When fresh weights of the three components add to less than fresh weight of whole diaspores, three reasons can account for this: there are several seeds per diaspore and component weights are given on a per-seed basis (this is footnoted when it occurs); or the seed(s) dissected were smaller than average; or seed components, usually fleshy parts, lost water during dissection before they could be weighed. Presence at the eight sites (1-4 relatively fertile soil, 5-8 infertile soil) is given to the nearest percentage cover, or '+' indicates less than 0.5% cover.

| Species                                      | Disp. Type | Growth form | Fresh wt of whole diaspore $\pm$ s.d. | Fresh wts of |             |               | Oven-dry as % fresh wt |     |     | % cover at site |   |   |   |   |   |   |    |
|----------------------------------------------|------------|-------------|---------------------------------------|--------------|-------------|---------------|------------------------|-----|-----|-----------------|---|---|---|---|---|---|----|
|                                              |            |             |                                       | disp struc   | other struc | embryo & endo | dis                    | oth | e+e | 1               | 2 | 3 | 4 | 5 | 6 | 7 | 8  |
| <i>Acacia floribunda</i>                     | 4          | 3           | 8.14 $\pm$ 0.26                       | 0.61         | 2.86        | 4.55          | 95                     | 93  | 96  | 3               | + | 0 | 0 | 0 | 0 | 0 | 0  |
| <i>Acacia cf irrorata</i>                    | 4          | 3           | 11.8 $\pm$ 1.48                       | 0.76         | 4.72        | 6.58          | 95                     | 94  | 97  | 0               | + | 0 | 1 | 0 | 0 | 0 | 0  |
| <i>Acacia suaveolens</i>                     | 4          | 2           | 40.7 $\pm$ 8.60                       | 1.90         | 12.3        | 17.7          | 97                     | 92  | 97  | 0               | 0 | 0 | 0 | + | + | + | +  |
| <i>Acacia ulicifolia</i> <sup>5</sup>        | 4          | 2           | 14.9 $\pm$ 1.67                       | 0.03         | 5.51        | 8.76          | 100                    | 91  | 95  | 0               | 0 | 0 | 0 | 0 | 0 | + | 0  |
| <i>Acianthus exsertus</i> <sup>17</sup>      | 1          | 1           | <.01                                  | -            | -           | -             | -                      | -   | -   | +               | + | 0 | 0 | 0 | 0 | 0 | 0  |
| <i>Acianthus sp.</i> <sup>17</sup>           | 1          | 1           | <.01                                  | -            | -           | -             | -                      | -   | -   | 0               | 0 | 0 | 0 | 0 | 0 | + | 0  |
| <i>Acmena smithii</i> <sup>6</sup>           | 3          | 3           | 1105 $\pm$ 189                        | 1089         | 3.50        | 9.60          | 31                     | 97  | 90  | 0               | 0 | 5 | 1 | 0 | 0 | 0 | 0  |
| <i>Acronychia oblongifolia</i> <sup>1</sup>  | 9          | 3           | 197 $\pm$ 43.3                        | 65.1         | 2.10        | 0.50          | 21                     | 87  | 68  | 0               | 0 | 0 | 1 | 0 | 0 | 0 | 0  |
| <i>Actinotus minor</i>                       | 4          | 1           | .948 $\pm$ .112                       | .116         | .434        | .390          | 97                     | 96  | 99  | 0               | 0 | 0 | 0 | 1 | 1 | + | +  |
| <i>Adiantum diaphanum</i> <sup>16</sup>      | 1          | 1           | .00008                                | -            | -           | -             | -                      | -   | -   | 0               | + | 0 | + | 0 | 0 | 0 | 0  |
| <i>Alectryon subcinereus</i> <sup>2</sup>    | 3          | 3           | -                                     | -            | -           | -             | -                      | -   | -   | 0               | 0 | + | + | 0 | 0 | 0 | 0  |
| <i>Aneilema acuminatum</i>                   | 1          | 1           | 1.06 $\pm$ 0.15                       | -            | .177        | 1.03          | -                      | 90  | 93  | 0               | 0 | + | + | 0 | 0 | 0 | 0  |
| <i>Angophora costata</i>                     | 1          | 3           | 15.6 $\pm$ 2.16                       | -            | 5.25        | 10.3          | -                      | 96  | 98  | 0               | 2 | 0 | 0 | 0 | 0 | 5 | 0  |
| <i>Angophora floribunda</i>                  | 1          | 3           | 14.0 $\pm$ 4.89                       | -            | 4.66        | 8.56          | -                      | 95  | 97  | 5               | 0 | 0 | 0 | 0 | 0 | 0 | 0  |
| <i>Angophora hispida</i>                     | 1          | 3           | 27.9 $\pm$ 10.6                       | -            | 9.58        | 19.9          | -                      | 96  | 97  | 0               | 0 | 0 | 0 | 1 | 3 | 0 | 3  |
| <i>Anisopogon avenaceus</i>                  | 1          | 1           | 16.6 $\pm$ 8.70                       | -            | 43.8        | 12.7          | -                      | 96  | 97  | 0               | 0 | 0 | 0 | 2 | + | + | 0  |
| <i>Aotus ericoides</i>                       | 4          | 2           | 3.60 $\pm$ 0.35                       | .120         | 1.32        | 2.37          | 84                     | 97  | 97  | 0               | 0 | 0 | 0 | 0 | 0 | 0 | +  |
| <i>Arthropodium milleflorum</i>              | 1          | 1           | .819 $\pm$ .107                       | -            | .143        | .641          | -                      | 97  | 97  | +               | + | 0 | 0 | 0 | 0 | 0 | 0  |
| <i>Asplenium australasicum</i> <sup>15</sup> | 1          | 1           | <.01                                  | -            | -           | -             | -                      | -   | -   | 0               | 0 | + | + | 0 | 0 | 0 | 0  |
| <i>Astrotricha flocculosa</i>                | 7          | 3           | 3.55 $\pm$ 0.58                       | 0.09         | 2.05        | 1.39          | 100                    | 96  | 99  | +               | 0 | 0 | 0 | 0 | 0 | 0 | 0  |
| <i>Backhousia myrtifolia</i>                 | 2          | 3           | 20.1 $\pm$ 1.79                       | 7.21         | 11.4        | 2.22          | 96                     | 95  | 98  | 0               | 0 | 0 | 3 | 0 | 0 | 0 | 0  |
| <i>Baeckea brevifolia</i>                    | 1          | 2           | .078 $\pm$ .006                       | -            | .043        | .033          | -                      | 81  | 76  | 0               | 0 | 0 | 0 | 0 | + | 0 | 0  |
| <i>Baeckea diosmifolia</i>                   | 1          | 2           | .064 $\pm$ .009                       | -            | .022        | .039          | -                      | 59  | 79  | 0               | 0 | 0 | 0 | 1 | 1 | 0 | 0  |
| <i>Baeckea imbricata</i>                     | 1          | 2           | .031 $\pm$ .004                       | -            | .013        | .025          | -                      | 85  | 92  | 0               | 0 | 0 | 0 | 0 | 0 | 0 | 1  |
| <i>Baeckea ramosissima</i> <sup>3</sup>      | 4          | 2           | .292 $\pm$ .058                       | .010         | .103        | .149          | 70                     | 94  | 99  | 0               | 0 | 0 | 0 | 0 | 0 | 0 | +  |
| <i>Banksia ericifolia</i>                    | 2          | 3           | 25.5 $\pm$ 5.23                       | 3.28         | 4.59        | 22.7          | 98                     | 98  | 98  | 0               | 0 | 0 | 0 | 0 | 6 | 1 | 22 |
| <i>Banksia marginata</i>                     | 2          | 3           | 12.1 $\pm$ 0.87                       | 1.05         | 1.70        | 9.11          | 96                     | 98  | 97  | 0               | 0 | 0 | 0 | 0 | 0 | + | +  |
| <i>Banksia oblongifolia</i>                  | 2          | 2           | 18.4 $\pm$ 6.18                       | 1.68         | 2.88        | 17.1          | 97                     | 98  | 100 | 0               | 0 | 0 | 0 | 1 | 1 | + | +  |
| <i>Banksia serrata</i>                       | 2          | 3           | 76.9 $\pm$ 9.71                       | 9.33         | 13.5        | 49.8          | 98                     | 98  | 98  | 0               | 0 | 0 | 0 | 1 | + | 4 | 1  |
| <i>Banksia spinulosa</i>                     | 2          | 2           | 11.4 $\pm$ 3.72                       | 1.06         | 2.35        | 9.11          | 99                     | 99  | 99  | 0               | 0 | 0 | 0 | + | 0 | 0 | 0  |
| <i>Bauera rubioides</i>                      | 4          | 2           | .577 $\pm$ .066                       | .126         | .156        | .287          | 60                     | 91  | 99  | 0               | 0 | 0 | 0 | 0 | 1 | + | +  |
| <i>Billardiera scandens</i> <sup>3</sup>     | 3          | 4           | 1722 $\pm$ 503                        | 16.4         | 0.54        | 2.35          | 19                     | 78  | 81  | 0               | + | 0 | 0 | + | 0 | + | 0  |
| <i>Blandfordia nobilis</i>                   | 1          | 1           | 2.96 $\pm$ 0.81                       | -            | 1.30        | 1.67          | -                      | 95  | 95  | 0               | 0 | 0 | 0 | + | 0 | 0 | 0  |
| <i>Blechnum cartilagineum</i> <sup>15</sup>  | 1          | 1           | <.01                                  | -            | -           | -             | -                      | -   | -   | 0               | + | + | 3 | 0 | 0 | + | 0  |
| <i>Boronia ledifolia</i> <sup>7</sup>        | 5          | 2           | 9.61 $\pm$ 0.74                       | 0.25         | 5.52        | 3.72          | 92                     | 98  | 99  | 0               | 0 | 0 | 0 | 0 | + | + | 0  |
| <i>Boronia pinnata</i> <sup>7</sup>          | 5          | 2           | 1.92 $\pm$ 0.23                       | .073         | .831        | .886          | 85                     | 95  | 98  | 0               | 0 | 0 | 0 | + | 0 | 0 | 0  |
| <i>Boronia serrulata</i> <sup>7</sup>        | 5          | 2           | 1.01 $\pm$ 0.13                       | .071         | .356        | .537          | 90                     | 95  | 98  | 0               | 0 | 0 | 0 | 0 | 1 | + | 0  |
| <i>Bossiaea ensata</i>                       | 4          | 1           | 19.6 $\pm$ 2.44                       | 0.50         | 5.91        | 12.1          | 94                     | 96  | 95  | 0               | 0 | 0 | 0 | 0 | 1 | 0 | +  |
| <i>Bossiaea heterophylla</i>                 | 4          | 2           | 17.9 $\pm$ 1.24                       | 1.65         | 5.23        | 10.6          | 96                     | 97  | 98  | 0               | 0 | 0 | 0 | + | 0 | + | +  |
| <i>Brachychiton sp.</i> <sup>8</sup>         | 1          | 3           | 329 $\pm$ 29.4                        | -            | 169         | 158           | -                      | 95  | 98  | 0               | + | 0 | 0 | 0 | 0 | 0 | 0  |
| <i>Brachyloma daphnoides</i> <sup>14</sup>   | 4          | 2           | 24.5 $\pm$ 6.06                       | 4.95         | 2.40        | 0.70          | 52                     | 93  | 90  | 0               | 0 | 0 | 0 | + | 0 | 0 | 0  |
| <i>Breynia oblongifolia</i> <sup>21</sup>    | 4          | 2           | 15.4 $\pm$ 1.55                       | 3.59         | 4.94        | 3.42          | 53                     | 92  | 96  | +               | + | + | + | 0 | 0 | 0 | 0  |
| <i>Burchardia umbellata</i> <sup>9</sup>     | 7          | 1           | 2.11 $\pm$ 0.63                       | -            | 0.34        | 1.83          | -                      | 94  | 95  | 0               | 0 | 0 | 0 | + | + | 0 | 0  |
| <i>Bursaria spinosa</i>                      | 2          | 3           | 1.73 $\pm$ 0.08                       | .130         | .341        | 1.18          | 98                     | 98  | 97  | 0               | + | 0 | 0 | 0 | 0 | 0 | 0  |
| <i>Caesia parviflora</i>                     | 4          | 1           | 2.52 $\pm$ 0.64                       | .110         | 1.15        | 1.46          | 90                     | 96  | 99  | 0               | 0 | 0 | 0 | + | 0 | + | 0  |



| Species                                     | Disp. Type | Growth form | Fresh wt of whole diaspore + s.d. | Fresh wts of struc | other struc | embryo & endo | Oven-dry as % fresh wt dis oth e+e | % cover at site |    |   |   |   |   |   |    |
|---------------------------------------------|------------|-------------|-----------------------------------|--------------------|-------------|---------------|------------------------------------|-----------------|----|---|---|---|---|---|----|
| <i>Epacris microphylla</i>                  | 1          | 2           | .029+.004                         | -                  | .009        | .020          | - 100 100                          | 1               | 2  | 3 | 4 | 5 | 6 | 7 | 8  |
| <i>Epacris obtusifolia</i>                  | 1          | 2           | .029+.009                         | -                  | .015        | .023          | - 100 100                          | 0               | 0  | 0 | 0 | 0 | 1 | + | 4  |
| <i>Epacris pulchella</i>                    | 1          | 2           | .068+.004                         | -                  | .025        | .053          | - 80 87                            | 0               | 0  | 0 | 0 | 1 | 0 | + | 0  |
| <i>Eriostemon australasius</i> <sup>7</sup> | 5          | 2           | 23.3+0.89                         | 2.03               | 13.3        | 7.82          | 97 94 99                           | 0               | 0  | 0 | 0 | 0 | + | 0 | 0  |
| <i>Eriostemon buxifolius</i> <sup>7</sup>   | 5          | 2           | 13.5+2.05                         | 0.81               | 6.91        | 4.81          | 98 98 99                           | 0               | 0  | 0 | 0 | 0 | + | 0 | +  |
| <i>Eucalyptus globoidea</i>                 | 1          | 3           | 1.23+0.32                         | -                  | 0.27        | 1.16          | - 100 99                           | 0               | 0  | 0 | 0 | 5 | 0 | 0 | 0  |
| <i>Eucalyptus gummifera</i>                 | 1          | 3           | 7.99+0.95                         | -                  | 2.02        | 5.45          | - 98 98                            | +               | 0  | 0 | 0 | 7 | 0 | 1 | 0  |
| <i>Eucalyptus haemostoma</i>                | 1          | 3           | 1.50+.301                         | -                  | .457        | 1.39          | - 96 98                            | 0               | 0  | 0 | 0 | 3 | 0 | + | 0  |
| <i>Eucalyptus paniculata</i> <sup>2</sup>   | 1          | 3           | -                                 | -                  | -           | -             | - - -                              | +               | +  | 0 | 0 | 0 | 0 | 0 | 0  |
| <i>Eucalyptus obtusiflora</i>               | 1          | 3           | 2.42+.400                         | -                  | 1.00        | 1.24          | - 100 100                          | 0               | 0  | 0 | 0 | 0 | 0 | 0 | 1  |
| <i>Eucalyptus pellita</i>                   | 1          | 3           | .797+.121                         | -                  | .117        | .679          | - 94 98                            | +               | 0  | 0 | 0 | 0 | 0 | 0 | 0  |
| <i>Eucalyptus pilularis</i>                 | 1          | 3           | 2.74+1.58                         | -                  | .856        | 1.40          | - 93 97                            | 0               | 9  | 0 | 0 | 0 | 0 | 0 | 0  |
| <i>Eucalyptus piperita</i>                  | 1          | 3           | 1.03+.176                         | -                  | .299        | .812          | - 97 98                            | 9               | 0  | 0 | 0 | 0 | 0 | 2 | 0  |
| <i>Eucalyptus saligna</i>                   | 1          | 3           | .481+.077                         | -                  | .102        | .346          | - 94 98                            | 0               | 11 | 0 | 3 | 0 | 0 | 0 | 0  |
| <i>Eucalyptus sieberi</i>                   | 1          | 3           | 1.88+.128                         | -                  | .377        | 1.45          | - 95 97                            | 0               | 0  | 0 | 0 | 0 | 0 | 3 | 0  |
| <i>Eucalyptus umbra</i>                     | 1          | 3           | .790+.192                         | -                  | .379        | .472          | - 94 97                            | 8               | 0  | 0 | 0 | 0 | 0 | 0 | 0  |
| <i>Euodia micrococca</i> <sup>7</sup>       | 5          | 3           | 8.00+0.34                         | 0.46               | 5.97        | 1.53          | 96 93 95                           | 0               | 0  | 0 | + | 0 | 0 | 0 | 0  |
| <i>Eupomatia laurina</i> <sup>38</sup>      | 7          | 3           | 26.6+4.18                         | -                  | 13.8        | 8.93          | - 28 48                            | 0               | 0  | 0 | + | 0 | 0 | 0 | 0  |
| <i>Eustrephus latifolius</i> <sup>39</sup>  | 3          | 4           | 911+76.4                          | 144                | 0.91        | 33.5          | 12 99 71                           | 1               | +  | + | + | 0 | 0 | 0 | 0  |
| <i>Gahnia aspera</i>                        | 1          | 1           | 28.7+1.80                         | -                  | 25.8        | 3.20          | - 95 97                            | 0               | 0  | + | 1 | 0 | 0 | 0 | 0  |
| <i>Gahnia erythrocarpa</i>                  | 1          | 1           | 16.9+1.93                         | -                  | 15.4        | 2.40          | - 93 97                            | 1               | 0  | 0 | 0 | 0 | 0 | 1 | 0  |
| <i>Gahnia melanocarpa</i>                   | 1          | 1           | 4.76+0.11                         | -                  | 3.66        | 0.67          | - 96 99                            | +               | 0  | 0 | 1 | 0 | 0 | 0 | 0  |
| <i>Galium binifolium</i>                    | 1          | 1           | .499+.059                         | -                  | .091        | .405          | - 92 96                            | 0               | +  | 0 | + | 0 | 0 | 0 | 0  |
| <i>Galium propinquum</i>                    | 8          | 1           | .448+.052                         | .021               | .060        | .351          | 71 97 95                           | +               | 0  | 0 | 0 | 0 | 0 | 0 | 0  |
| <i>Geitonoplesium cymosum</i> <sup>40</sup> | 3          | 4           | 429+147                           | 64.0               | 4.61        | 8.04          | 9 54 16                            | +               | +  | + | + | 0 | 0 | 0 | 0  |
| <i>Geranium homeanum</i>                    | 1          | 1           | 1.72+.050                         | -                  | 0.46        | 1.27          | - 93 98                            | 0               | 0  | + | 0 | 0 | 0 | 0 | 0  |
| <i>Gleichenia rupestris</i> <sup>15</sup>   | 1          | 1           | <.01                              | -                  | -           | -             | - - -                              | 0               | 0  | 0 | 0 | 0 | 0 | + | +  |
| <i>Glossodia minor</i> <sup>18</sup>        | 1          | 1           | .0009                             | -                  | -           | -             | - - -                              | 0               | 0  | 0 | 0 | + | 0 | 0 | 0  |
| <i>Glochidion ferdinandi</i>                | 1          | 3           | 18.2+1.86                         | -                  | 11.4        | 5.06          | - 96 95                            | 1               | 14 | 0 | 0 | 0 | 0 | 0 | 0  |
| <i>Glycine clandestina</i>                  | 1          | 4           | 4.35+0.80                         | -                  | 1.38        | 3.09          | - 94 94                            | +               | +  | 0 | + | 0 | 0 | 0 | 0  |
| <i>Gompholobium glabratum</i>               | 4          | 2           | 2.94+0.29                         | .025               | 1.17        | 1.59          | 100 97 99                          | 0               | 0  | 0 | 0 | + | + | + | +  |
| <i>Gompholobium grandiflorum</i>            | 4          | 2           | 3.85+.769                         | .028               | 1.71        | 2.10          | 86 95 97                           | 0               | 0  | 0 | 0 | + | 0 | 0 | 0  |
| <i>Gonocarpus teucrioides</i>               | 1          | 1           | 1.23+.171                         | -                  | .741        | .419          | - 98 97                            | 0               | 0  | 0 | 0 | + | 0 | + | +  |
| <i>Goodenia bellidifolia</i>                | 4          | 1           | .801+.077                         | .126               | .291        | .313          | 96 95 99                           | 0               | 0  | 0 | 0 | + | + | 0 | 0  |
| <i>Goodenia ovata</i>                       | 4          | 1           | .803+.083                         | .070               | .305        | .431          | 77 95 96                           | 0               | 0  | 0 | + | 0 | 0 | 0 | 0  |
| <i>Grevillea buxifolia</i>                  | 4          | 2           | 69.1+6.04                         | 8.44               | 30.0        | 32.2          | 95 94 97                           | 0               | 0  | 0 | 0 | + | + | + | 0  |
| <i>Grevillea oleoides</i>                   | 4          | 2           | 28.4+2.13                         | 1.74               | 12.4        | 15.2          | 93 94 97                           | 0               | 0  | 0 | 0 | 0 | + | + | 0  |
| <i>Grevillea sericea</i>                    | 4          | 2           | 24.0+0.77                         | 1.66               | 13.7        | 8.51          | 99 97 99                           | 0               | 0  | 0 | 0 | 0 | + | 0 | 0  |
| <i>Grevillea speciosa</i>                   | 4          | 2           | 32.1+1.45                         | 2.98               | 17.3        | 11.3          | 97 95 97                           | 0               | 0  | 0 | 0 | + | + | 0 | 0  |
| <i>Grevillea sphacelata</i>                 | 4          | 2           | 34.8+1.87                         | 3.15               | 15.6        | 14.3          | 98 96 98                           | 0               | 0  | 0 | 0 | 0 | 0 | 0 | +  |
| <i>Guoia semiglauc</i>                      | 3          | 3           | 39.5+2.88                         | 8.63               | 4.07        | 24.8          | 85 90 95                           | 0               | 0  | 6 | 1 | 0 | 0 | 0 | 0  |
| <i>Gymnostachys anceps</i>                  | 3          | 1           | 839+197                           | 196                | -           | 508           | 18 - 45                            | +               | 0  | 1 | 1 | 0 | 0 | 0 | 0  |
| <i>Haemodorum corymbosum</i>                | 2          | 1           | 11.9+1.60                         | 1.04               | 0.63        | 10.1          | 96 97 92                           | 0               | 0  | 0 | 0 | + | 0 | 0 | 0  |
| <i>Hakea dactyloides</i>                    | 2          | 3           | 22.7+4.30                         | 2.00               | 4.60        | 15.9          | 99 100 97                          | 0               | 0  | 0 | 0 | + | + | + | +  |
| <i>Hakea gibbosa</i>                        | 2          | 2           | 67.8+3.60                         | 4.20               | 18.5        | 43.9          | 93 95 95                           | 0               | 0  | 0 | 0 | + | + | + | 1  |
| <i>Hakea sericea</i>                        | 2          | 3           | 31.1+3.31                         | 1.46               | 6.03        | 22.6          | 99 98 98                           | +               | 0  | 0 | 0 | 0 | 0 | 0 | 0  |
| <i>Hakea teretifolia</i>                    | 2          | 3           | 13.6+2.20                         | 0.90               | 2.00        | 12.7          | 100 100 98                         | 0               | 0  | 0 | 0 | + | 3 | + | 11 |
| <i>Helichrysum diosmifolium</i>             | 2          | 3           | .076+.009                         | .012               | .031        | .043          | 50 81 81                           | 0               | +  | 0 | 0 | 0 | 0 | 0 | 0  |
| <i>Helichrysum elatum</i>                   | 2          | 2           | .662+.072                         | .115               | .199        | .354          | 92 94 97                           | 0               | 0  | 0 | + | 0 | 0 | 0 | 0  |
| <i>Hemigenia purpurea</i>                   | 4          | 2           | 1.13+.015                         | .039               | .791        | .323          | 62 92 92                           | 0               | 0  | 0 | 0 | + | 1 | + | +  |
| <i>Hibbertia aspera</i>                     | 4          | 2           | 2.89+0.33                         | 0.49               | 0.91        | 1.74          | 90 92 95                           | 0               | +  | 0 | 0 | 0 | 0 | 0 | 0  |
| <i>Hibbertia bracteata</i>                  | 4          | 2           | 4.95+0.72                         | 0.75               | 0.90        | 3.00          | 92 96 94                           | 0               | 0  | 0 | 0 | + | 0 | 0 | 0  |
| <i>Hibbertia cistiflora</i> <sup>2</sup>    | 4          | 2           | -                                 | -                  | -           | -             | - - -                              | 0               | 0  | 0 | 0 | 0 | + | 0 | 0  |
| <i>Hibbertia dentata</i>                    | 4          | 4           | 8.62+1.33                         | 1.18               | 3.25        | 4.10          | 89 92 95                           | 1               | 0  | 0 | 0 | 0 | 0 | 0 | 0  |
| <i>Hibbertia empetrifolia</i>               | 4          | 2           | 4.39+0.91                         | 0.36               | 1.74        | 2.23          | 89 94 95                           | +               | 0  | 0 | 0 | + | + | 0 | 0  |
| <i>Hibbertia linearis</i>                   | 4          | 2           | 6.73+0.56                         | 0.89               | 1.82        | 4.01          | 94 93 96                           | 0               | 0  | 0 | 0 | 0 | + | + | 0  |
| <i>Hibbertia nitida</i>                     | 4          | 2           | 4.11+0.05                         | 0.45               | 1.00        | 2.56          | 93 94 95                           | 0               | 0  | 0 | 0 | 0 | 0 | + | 0  |
| <i>Hibbertia riparia</i>                    | 4          | 2           | 1.67+0.08                         | 0.17               | 0.45        | 1.09          | 82 91 95                           | 0               | 0  | 0 | 0 | + | + | 0 | 1  |
| <i>Hibbertia scandens</i>                   | 3          | 4           | 43.2+5.70                         | 30.1               | 1.95        | 7.00          | 21 93 85                           | 0               | 1  | 0 | 0 | 0 | 0 | 0 | +  |
| <i>Hibbertia serpyllifolia</i>              | 4          | 1           | 1.59+.208                         | .155               | .332        | 1.16          | 97 98 98                           | 0               | 0  | 0 | 0 | 0 | 0 | + | 0  |
| <i>Hovea linearis</i>                       | 4          | 2           | 22.7+0.96                         | 1.80               | 6.36        | 12.9          | 97 98 98                           | 0               | 0  | 0 | 0 | + | + | 0 | 0  |
| <i>Hybanthus monopetalus</i>                | 4          | 1           | 1.39+.200                         | .109               | .350        | .853          | 97 96 99                           | +               | 0  | 0 | 0 | 0 | 0 | 0 | 0  |
| <i>Hybanthus vernonii</i>                   | 4          | 1           | 3.67+.360                         | .251               | 1.48        | 2.07          | 98 96 99                           | 0               | 0  | 0 | 0 | 0 | 0 | + | 0  |
| <i>Hydrocotyle acutiloba</i>                | 1          | 1           | 0.32+0.04                         | -                  | 0.21        | 0.13          | - 86 85                            | +               | +  | + | + | 0 | 0 | 0 | 0  |
| <i>Imperata cylindrica</i> <sup>2</sup>     | 2          | 1           | -                                 | -                  | -           | -             | - - -                              | 1               | +  | 0 | 0 | 0 | 0 | 0 | 0  |
| <i>Isopogon anemonifolius</i>               | 1          | 2           | 3.68+0.56                         | -                  | 1.15        | 2.93          | - 100 100                          | 0               | 0  | 0 | 0 | 2 | 0 | + | 0  |
| <i>Isopogon anethifolius</i>                | 1          | 3           | 3.05+0.22                         | -                  | 0.75        | 2.08          | - 100 100                          | 0               | 0  | 0 | 0 | + | + | 0 | +  |
| <i>Kunzea capitata</i>                      | 1          | 2           | .087+.004                         | -                  | .032        | .057          | - 78 86                            | 0               | 0  | 0 | 0 | 0 | 3 | + | 1  |
| <i>Lagenifera stiptata</i>                  | 1          | 1           | .464+.038                         | -                  | .132        | .338          | - 98 96                            | +               | 0  | 0 | 0 | 0 | 0 | 0 | 0  |
| <i>Lambertia formosa</i>                    | 1          | 2           | 21.3+4.70                         | -                  | 10.1        | 15.6          | - 97 98                            | 0               | 0  | 0 | 0 | + | + | 1 | +  |
| <i>Lantana camara</i> <sup>41</sup>         | 3          | 2           | 141+21.4                          | 98.6               | 25.8        | 2.39          | 20 81 88                           | 0               | 2  | 0 | 0 | 0 | 0 | 0 | 0  |
| <i>Lasiopetalum ferrugineum</i>             | 4          | 3           | 1.64+0.34                         | .071               | .587        | .719          | 90 94 98                           | 1               | 0  | 0 | 0 | 0 | 0 | + | 0  |

| Species                                       | Disp. Type | Growth form | Fresh wt of whole  | Fresh wts of |              |               | Oven-dry as |     |     | % cover at site |   |    |    |   |   |   |   |
|-----------------------------------------------|------------|-------------|--------------------|--------------|--------------|---------------|-------------|-----|-----|-----------------|---|----|----|---|---|---|---|
|                                               |            |             | diaspore<br>+ s.d. | struc        | other struc  | embryo & endo | % fresh wt  | dis | oth | e+e             | 1 | 2  | 3  | 4 | 5 | 6 | 7 |
| <i>Lastreopsis decomposita</i> <sup>15</sup>  | 1          | 1           | <.01               | -            | -            | -             | -           | -   | -   | 0               | 0 | 12 | 12 | 0 | 0 | 0 | 0 |
| <i>Lastreopsis microsora</i> <sup>15,77</sup> | 1          | 1           | <.01               | -            | -            | -             | -           | -   | -   | 0               | 0 | +  | 0  | 0 | 0 | 0 | 0 |
| <i>Lepidosperma flexulosum</i>                | 4          | 1           | 5.41±0.39          | 0.28         | 3.06         | 2.11          | 89          | 97  | 96  | 0               | 0 | 0  | 0  | 0 | + | 0 | + |
| <i>Lepidosperma laterale</i>                  | 4          | 1           | 4.30±1.99          | 0.14         | 2.35         | 0.58          | 86          | 97  | 98  | 10              | + | 0  | 0  | 1 | + | 0 | + |
| <i>Lepidosperma</i> sp. A                     | 4          | 1           | 11.5±1.87          | 1.84         | 4.81         | 4.78          | 97          | 97  | 97  | 0               | 0 | 0  | 0  | 0 | + | + | 0 |
| <i>Lepidosperma urophorum</i>                 | 4          | 1           | 6.36±0.82          | 0.40         | 3.47         | 2.59          | 98          | 99  | 98  | +               | 0 | 0  | 0  | 0 | 0 | 1 | 0 |
| <i>Leptocarpus tenax</i>                      | 1          | 1           | 1.58±0.08          | -            | 1.24         | 0.43          | -           | 90  | 93  | 0               | 0 | 0  | 0  | 0 | 0 | 1 | 1 |
| <i>Leptospermum attenuatum</i>                | 1          | 3           | .192±.008          | -            | .053         | .155          | -           | 85  | 95  | 0               | 0 | 0  | 0  | 6 | 0 | 6 | 1 |
| <i>Leptospermum flavescens</i>                | 1          | 3           | .122±.015          | -            | .017         | .114          | -           | 76  | 87  | 1               | 0 | 0  | 0  | 0 | 0 | + | 0 |
| <i>Leptospermum juniperinum</i>               | 1          | 3           | .141±.029          | -            | .051         | .115          | -           | 96  | 99  | 0               | 0 | 0  | 0  | + | + | + | 1 |
| <i>Lepyrodia scariosa</i>                     | 1          | 1           | .240±.026          | -            | .082         | .155          | -           | 99  | 99  | 0               | 0 | 0  | 0  | + | 1 | 1 | 1 |
| <i>Leucopogon amplexicaulis</i> <sup>42</sup> | 4          | 2           | 5.60±0.96          | 1.92         | 4.30         | 0.92          | 97          | 94  | 96  | 0               | 0 | 0  | 0  | 0 | 0 | + | 0 |
| <i>Leucopogon appressus</i>                   | 4          | 2           | .646±.053          | .040         | .448         | .171          | 100         | 96  | 99  | 0               | 0 | 0  | 0  | 0 | + | 0 | 0 |
| <i>Leucopogon esquamatus</i>                  | 4          | 2           | 7.94±1.01          | 1.27         | 6.04         | 0.84          | 87          | 93  | 96  | 0               | 0 | 0  | 0  | + | 1 | 0 | + |
| <i>Leucopogon juniperinus</i> <sup>43</sup>   | 4          | 2           | 22.4±2.32          | 4.53         | 5.43         | 2.25          | 94          | 94  | 94  | 0               | + | 0  | 0  | 0 | 0 | 0 | 0 |
| <i>Leucopogon lanceolatus</i> <sup>44</sup>   | 4          | 2           | 32.2±4.66          | 10.7         | 2.44         | 1.30          | 42          | 85  | 88  | 0               | 1 | 0  | 0  | 0 | 0 | 0 | 0 |
| <i>Leucopogon microphyllus</i> <sup>45</sup>  | 4          | 2           | .690±.121          | .039         | .286         | .351          | 72          | 96  | 93  | 0               | 0 | 0  | 0  | 1 | 1 | + | + |
| <i>Ligustrum lucidum</i> <sup>46</sup>        | 3          | 3           | 148±30.5           | 51.9         | 7.29         | 26.2          | 15          | 92  | 56  | 0               | + | 0  | 0  | 0 | 0 | 0 | 0 |
| <i>Ligustrum sinense</i>                      | 3          | 3           | 73.9±23.3          | 28.4         | 5.44         | 30.5          | 41          | 88  | 58  | 0               | 1 | 0  | 0  | 0 | 0 | 0 | 0 |
| <i>Lindsaea linearis</i> <sup>15</sup>        | 1          | 1           | <.01               | -            | -            | -             | -           | -   | -   | 0               | 0 | 0  | 0  | + | 0 | + | + |
| <i>Livistona australis</i>                    | 3          | 3           | 2702±497           | 1214         | 130          | 1221          | 26          | 93  | 59  | 3               | 0 | 5  | 10 | 0 | 0 | 0 | 0 |
| <i>Logania pusilla</i>                        | 1          | 1           | .365±.066          | -            | .179         | .186          | -           | 98  | 100 | 0               | 0 | 0  | 0  | + | 0 | 0 | 0 |
| <i>Lomandra confertifolia</i>                 | 4          | 1           | 19.9±4.47          | 0.80         | 0.40         | 17.8          | 100         | 100 | 96  | +               | 0 | 0  | 0  | 0 | 0 | 0 | 0 |
| <i>Lomandra cylindrica</i>                    | 4          | 1           | 14.6±3.37          | 0.32         | 0.19         | 13.4          | 100         | 100 | 96  | 0               | 0 | 0  | 0  | 1 | 0 | 0 | 0 |
| <i>Lomandra filiformis</i> <sup>48</sup>      | 4          | 1           | 6.08±1.36          | 0.43         | -            | 5.69          | 100         | -   | 96  | +               | + | 0  | 0  | 0 | 0 | 0 | 0 |
| <i>Lomandra glauca</i> <sup>49</sup>          | 4          | 1           | 5.89±0.79          | 0.53         | -            | 5.54          | 75          | -   | 94  | 0               | 0 | 0  | 0  | 1 | + | + | + |
| <i>Lomandra gracilis</i>                      | 4          | 1           | 16.5±6.18          | 0.64         | 1.00         | 14.7          | 98          | 95  | 93  | +               | 0 | 0  | 0  | 0 | 0 | + | 0 |
| <i>Lomandra longifolia</i>                    | 4          | 1           | 12.2±3.09          | 0.09         | 0.17         | 12.0          | 100         | 100 | 93  | +               | 3 | 0  | 0  | 0 | 0 | 0 | 0 |
| <i>Lomandra multiflora</i> <sup>48</sup>      | 4          | 1           | 9.03±1.28          | 2.02         | -            | 8.26          | 96          | -   | 95  | +               | 0 | 0  | 0  | 0 | 0 | 1 | 0 |
| <i>Lomandra obliqua</i> <sup>49</sup>         | 4          | 1           | 5.07±0.97          | 0.45         | -            | 4.22          | 73          | -   | 93  | 0               | 0 | 0  | 0  | + | 0 | + | + |
| <i>Lomatia silaifolia</i>                     | 2          | 2           | 16.3±0.44          | 1.82         | 3.27         | 11.1          | 98          | 100 | 97  | +               | 0 | 0  | 0  | + | 0 | + | + |
| <i>Macrozamia communis</i>                    | 3          | 2           | 18412±1212         | 6594         | 4365         | 7293          | 74          | 81  | 54  | 6               | 0 | 0  | 0  | 0 | 0 | 0 | 0 |
| <i>Marsdenia flavescens</i> <sup>2</sup>      | 2          | 4           | -                  | -            | -            | -             | -           | -   | -   | 0               | 0 | +  | 1  | 0 | 0 | 0 | 0 |
| <i>Maytenus silvestris</i>                    | 4          | 4           | 17.6±2.81          | 4.27         | 3.96         | 10.8          | 90          | 89  | 96  | +               | + | 0  | 0  | 0 | 0 | 0 | 0 |
| <i>Micrantheum ericoides</i>                  | 4          | 1           | 3.79±0.52          | 0.25         | 1.63         | 1.71          | 100         | 99  | 99  | 0               | 0 | 0  | 0  | 0 | 0 | + | + |
| <i>Microlaena stipoides</i>                   | 1          | 1           | 6.01±2.12          | -            | 1.95         | 4.81          | -           | 96  | 94  | 1               | + | 0  | 0  | 0 | 0 | 0 | 0 |
| <i>Mirbelia rubiifolia</i>                    | 4          | 2           | 3.21±0.08          | .015         | 2.06         | 1.01          | 33          | 96  | 96  | 0               | 0 | 0  | 0  | 0 | + | + | 1 |
| <i>Mitrasacme polymorpha</i>                  | 1          | 1           | .041±.005          | -            | .015         | .026          | -           | 93  | 100 | 0               | 0 | 0  | 0  | + | 0 | + | + |
| <i>Monotoca scoparia</i> <sup>50</sup>        | 4          | 2           | 6.64±1.78          | 1.89         | 0.91         | 0.66          | 97          | 97  | 95  | 0               | 0 | 0  | 0  | + | + | + | 0 |
| <i>Morinda jasminoides</i> <sup>51</sup>      | 3          | 4           | 302±15.1           | 13.1         | 3.59         | 2.38          | 19          | 92  | 90  | 0               | + | +  | +  | 0 | 0 | 0 | 0 |
| <i>Notelaea venosa</i>                        | 3          | 3           | 803±256            | 676          | 115          | 86.3          | 28          | 74  | 53  | +               | + | 0  | +  | 0 | 0 | 0 | 0 |
| <i>Ochna serrulata</i> <sup>52</sup>          | 3          | 2           | 241±51.0           | 80.0         | 6.29         | 110           | 79          | 55  | 73  | 0               | + | 0  | 0  | 0 | 0 | 0 | 0 |
| <i>Olea africana</i>                          | 3          | 3           | 1043±51.0          | 821          | 146          | 23.1          | 22          | 96  | 98  | 0               | + | 0  | 0  | 0 | 0 | 0 | 0 |
| <i>Opercularia aspera</i>                     | 4          | 1           | .534±.038          | .036         | .157         | .345          | 92          | 97  | 97  | 0               | + | 0  | 0  | 0 | 0 | 0 | 0 |
| <i>Oplismenus aemula</i>                      | 1          | 1           | 0.95±0.13          | -            | 0.30         | 0.65          | -           | 87  | 95  | 1               | 1 | +  | 1  | 0 | 0 | 0 | 0 |
| <i>Orchidaceae</i> sp. <sup>17</sup>          | 1          | 1           | <.01               | -            | -            | -             | -           | -   | -   | 0               | 0 | 0  | 0  | + | 0 | 0 | 0 |
| <i>Oxalis chnoodes</i> <sup>53</sup>          | 6          | 1           | .383±.022          | -            | .197         | .166          | -           | 96  | 99  | 0               | 0 | +  | +  | 0 | 0 | 0 | 0 |
| <i>Oxalis exilis</i> <sup>53</sup>            | 6          | 1           | .324±.117          | -            | .171         | .182          | -           | 95  | 99  | 1               | + | 0  | 0  | 0 | 0 | 0 | 0 |
| <i>Palmeria scandens</i> <sup>2</sup>         | 3          | 4           | -                  | -            | -            | -             | -           | -   | -   | 0               | 0 | 3  | +  | 0 | 0 | 0 | 0 |
| <i>Pandorea pandorana</i>                     | 2          | 4           | 5.74±1.06          | 0.59         | 1.24         | 4.20          | 90          | 92  | 97  | 1               | + | +  | +  | 0 | 0 | 0 | 0 |
| <i>Parsonsia straminea</i>                    | 2          | 4           | 12.9±1.97          | 2.04         | 1.51         | 9.51          | 94          | 93  | 94  | 0               | + | +  | +  | 0 | 0 | + | 0 |
| <i>Paspalidium</i> sp.                        | 1          | 1           | 0.86±0.17          | -            | 0.37         | 0.41          | -           | 97  | 95  | +               | 0 | 0  | 0  | 0 | 0 | 0 | 0 |
| <i>Passiflora edulis</i> <sup>54</sup>        | 3          | 4           | 29007±2720         | 280          | 12.1         | 4.78          | 16          | 84  | 28  | 0               | + | 0  | 0  | 0 | 0 | 0 | 0 |
| <i>Patersonia glabrata</i>                    | 4          | 1           | 7.62±0.67          | 1.21         | 2.23         | 4.09          | 92          | 97  | 100 | +               | 0 | 0  | 0  | + | 1 | + | + |
| <i>Patersonia sericea</i>                     | 4          | 1           | 1.55±0.05          | .010         | .216         | 1.33          | 90          | 97  | 96  | 0               | 0 | 0  | 0  | + | + | + | 0 |
| <i>Pellaea falcata</i> <sup>15</sup>          | 1          | 1           | <.01               | -            | -            | -             | -           | -   | -   | 0               | 0 | +  | +  | 0 | 0 | 0 | 0 |
| <i>Persoonia lanceolata</i> <sup>55</sup>     | 3          | 2           | 1296±94.0          | 1188         | 100          | 13.4          | 24          | 90  | 92  | 0               | 0 | 0  | 0  | + | + | + | 1 |
| <i>Persoonia laurina</i> <sup>55</sup>        | 3          | 2           | 1335±2.16          | 1022         | 164          | 33.0          | 22          | 87  | 69  | 0               | 0 | 0  | 0  | 0 | 0 | + | 0 |
| <i>Persoonia levis</i> <sup>55</sup>          | 3          | 3           | 1697±549           | 1566         | 254          | 30.3          | 24          | 80  | 75  | 0               | 0 | 0  | 0  | + | + | + | 0 |
| <i>Persoonia linearis</i> <sup>55</sup>       | 3          | 3           | 1905±294           | 1501         | 226          | 10.8          | 17          | 76  | 70  | +               | + | 0  | 0  | 0 | 0 | 0 | 0 |
| <i>Persoonia pinifolia</i> <sup>55</sup>      | 3          | 3           | 1268±121           | 1065         | 207          | 8.54          | 19          | 81  | 79  | 0               | 0 | 0  | 0  | + | 0 | + | + |
| <i>Petrophile pulchella</i>                   | 1          | 3           | 8.68±0.45          | -            | 4.80         | 3.26          | -           | 99  | 99  | 0               | 0 | 0  | 0  | 1 | 1 | 0 | 4 |
| <i>Phebalium squamulosum</i> <sup>56</sup>    | 5          | 2           | 1.42±0.18          | .026         | .630         | .739          | 96          | 96  | 98  | 0               | 0 | 0  | 0  | 0 | + | 0 | 0 |
| <i>Philothea salsifolia</i> <sup>57</sup>     | 5          | 2           | 8.17±1.40          | .570         | 5.37         | 2.57          | 95          | 93  | 98  | 0               | 0 | 0  | 0  | 0 | + | 0 | + |
| <i>Phyllanthus thymoides</i> <sup>58</sup>    | 6          | 1           | 1.49±.225          | -            | .487         | 1.07          | -           | 92  | 99  | 0               | 0 | 0  | 0  | + | 0 | 0 | 0 |
|                                               |            |             | Fresh wt           |              | Fresh wts of |               | Oven-dry as |     |     |                 |   |    |    |   |   |   |   |

| Species                                           | Disp. Type | Growth form | of whole diaspore + s.d. | disp struc | other struc | embryo & endo | % fresh wt dis | % fresh wt oth | % fresh wt e+e | % cover at site |    |   |   |   |    |   |   |
|---------------------------------------------------|------------|-------------|--------------------------|------------|-------------|---------------|----------------|----------------|----------------|-----------------|----|---|---|---|----|---|---|
|                                                   |            |             |                          |            |             |               |                |                |                | 1               | 2  | 3 | 4 | 5 | 6  | 7 | 8 |
| <i>Phyllota phyllicoides</i> <sup>59</sup>        | 4          | 2           | 3.66+0.44                | 0.06       | 1.30        | 1.73          | 67             | 96             | 99             | 0               | 0  | 0 | 0 | 3 | +  | 0 | + |
| <i>Pimelea latifolia</i>                          | 4          | 2           | 4.81+1.03                | 0.31       | 2.61        | 2.47          | 97             | 98             | 100            | +               | 0  | 0 | 0 | 0 | 0  | 0 | 0 |
| <i>Pimelea linifolia</i>                          | 4          | 2           | 3.33+0.329               | .154       | 1.68        | 1.17          | 92             | 97             | 99             | 0               | 0  | 0 | 0 | + | 0  | + | + |
| <i>Pittosporum revolutum</i> <sup>60</sup>        | 9          | 3           | 31.2+4.96                | 5.03       | 2.35        | 26.3          | 25             | 79             | 58             | 0               | +  | 0 | 0 | 0 | 0  | 0 | 0 |
| <i>Pittosporum undulatum</i> <sup>60</sup>        | 9          | 3           | 7.10+1.43                | 1.46       | 1.55        | 4.72          | 16             | 97             | 93             | 0               | 30 | 0 | 0 | 0 | 0  | 0 | 0 |
| <i>Platylobium formosum</i>                       | 4          | 2           | 6.13+0.60                | 0.33       | 1.44        | 4.20          | 94             | 92             | 95             | 0               | +  | 0 | 0 | 0 | 0  | 0 | 0 |
| <i>Platysace linearifolia</i>                     | 4          | 2           | .753+0.024               | .100       | .191        | .408          | 89             | 96             | 98             | 0               | 0  | 0 | 0 | + | +  | + | + |
| <i>Platysace stephensonii</i>                     | 4          | 2           | .431+0.059               | .067       | .160        | .250          | 79             | 91             | 91             | 0               | 0  | 0 | 0 | 0 | 0  | 0 | + |
| <i>Poa compressa</i>                              | 1          | 1           | .368+0.147               | -          | .075        | .252          | -              | 92             | 90             | 2               | +  | 0 | 1 | 0 | 0  | 0 | 0 |
| <i>Polyosma cunninghamii</i> <sup>2</sup>         | 3          | 3           | -                        | -          | -           | -             | -              | -              | -              | 0               | 0  | + | + | 0 | 0  | 0 | 0 |
| <i>Polyscias sambucifolia</i> <sup>61</sup>       | 3          | 3           | 52.6+16.4                | 13.6       | 2.46        | 1.59          | 18             | 91             | 92             | 0               | +  | 0 | + | 0 | 0  | 0 | 0 |
| <i>Pomaderris</i> sp.                             | 4          | 2           | 0.84+0.15                | 0.05       | 0.27        | 0.36          | 80             | 89             | 94             | 1               | 0  | 0 | 0 | 0 | 0  | 0 | 0 |
| <i>Pomax umbellata</i>                            | 1          | 1           | 1.14+0.117               | -          | .306        | .851          | -              | 93             | 93             | +               | 0  | 0 | 0 | 0 | 0  | 0 | 0 |
| <i>Poranthera ericifolia</i> <sup>62</sup>        | 5          | 1           | .435+0.025               | .032       | .095        | .325          | 88             | 95             | 98             | 0               | 0  | 0 | 0 | + | 0  | 0 | 0 |
| <i>Poranthera microphylla</i> <sup>63</sup>       | 5          | 1           | .120+0.025               | .010       | .036        | .075          | 70             | 92             | 99             | +               | 0  | 0 | 0 | 0 | 0  | 0 | 0 |
| <i>Prasophyllum</i> sp. <sup>18</sup>             | 1          | 1           | .0026                    | -          | -           | -             | -              | -              | -              | 0               | 0  | 0 | 0 | 0 | +  | 0 | 0 |
| <i>Pratia purpurescens</i>                        | 1          | 1           | .171+0.040               | -          | .063        | .106          | -              | 94             | 97             | +               | +  | 0 | 0 | 0 | 0  | 0 | 0 |
| <i>Pseuderanthemum variabile</i>                  | 1          | 1           | 3.06+0.41                | -          | 0.69        | 2.52          | -              | 94             | 97             | 3               | 1  | + | 1 | 0 | 0  | 0 | 0 |
| <i>Psychotria loniceroides</i> <sup>64</sup>      | 3          | 3           | 152+59.2                 | 89.2       | 6.49        | 10.8          | 8              | 60             | 75             | 0               | 0  | + | 0 | 0 | 0  | 0 | 0 |
| <i>Pteridium esculentum</i> <sup>15</sup>         | 1          | 1           | <.01                     | -          | -           | -             | -              | -              | -              | 2               | +  | + | + | 0 | 0  | 0 | 0 |
| <i>Pterostylis cf daintreana</i> <sup>18</sup>    | 1          | 1           | .0008                    | -          | -           | -             | -              | -              | -              | 0               | 0  | 0 | 0 | 0 | +  | 0 | 0 |
| <i>Pterostylis cf nutans</i> <sup>18</sup>        | 1          | 1           | .0007                    | -          | -           | -             | -              | -              | -              | +               | 0  | 0 | 0 | 0 | 0  | 0 | 0 |
| <i>Pterostylis pedunculata</i> <sup>17</sup>      | 1          | 1           | <.01                     | -          | -           | -             | -              | -              | -              | 0               | +  | 0 | 0 | 0 | 0  | 0 | 0 |
| <i>Pterostylis</i> sp. <sup>4</sup> <sup>17</sup> | 1          | 1           | <.01                     | -          | -           | -             | -              | -              | -              | +               | 0  | 0 | 0 | 0 | 0  | 0 | 0 |
| <i>Ptilantherium deusteu</i> <sup>2</sup>         | 7          | 1           | -                        | -          | -           | -             | -              | -              | -              | 0               | 0  | 0 | 0 | 0 | +  | 0 | 0 |
| <i>Pultenea elliptica</i>                         | 4          | 2           | 2.18+0.36                | 0.18       | 0.91        | 1.30          | 94             | 97             | 98             | 0               | 0  | 0 | 0 | + | +  | + | + |
| <i>Pultenea flexilis</i>                          | 4          | 3           | 6.00+1.48                | 0.47       | 2.84        | 3.37          | 95             | 93             | 96             | +               | 0  | 0 | 0 | 0 | 0  | 0 | 0 |
| <i>Pultenea linophylla</i>                        | 4          | 2           | 8.78+1.29                | 0.93       | 4.67        | 3.13          | 95             | 94             | 94             | 0               | 0  | 0 | 0 | 0 | 0  | 0 | + |
| <i>Pultenea stipularis</i>                        | 4          | 2           | 10.5+0.87                | 0.80       | 5.83        | 4.13          | 75             | 94             | 92             | 0               | 0  | 0 | 0 | 0 | 0  | 2 | 0 |
| <i>Pyrrosia rupestris</i> <sup>15</sup>           | 1          | 1           | <.01                     | -          | -           | -             | -              | -              | -              | 0               | 0  | 0 | + | 0 | 0  | 0 | 0 |
| <i>Rapanea howittiana</i> <sup>2</sup>            | 3          | 3           | -                        | -          | -           | -             | -              | -              | -              | 0               | 0  | 0 | + | 0 | 0  | 0 | 0 |
| <i>Rapanea variabilis</i> <sup>65</sup>           | 3          | 3           | 161+15.9                 | 76.7       | 25.6        | 38.8          | 19             | 79             | 18             | +               | 0  | 0 | 0 | 0 | 0  | 0 | 0 |
| <i>Restio dimorphus</i>                           | 4          | 1           | .673+0.068               | .025       | .264        | .382          | 72             | 98             | 95             | 0               | 0  | 0 | 0 | 0 | 0  | + | 3 |
| <i>Restio fastigiatus</i>                         | 4          | 1           | .494+0.038               | .019       | .135        | .319          | 89             | 96             | 95             | 0               | 0  | 0 | 0 | 0 | 15 | 0 | 3 |
| <i>Ricinocarpos pinifolius</i>                    | 4          | 2           | 55.3+7.30                | 5.70       | 19.0        | 30.5          | 98             | 95             | 99             | 0               | 0  | 0 | 0 | 0 | 0  | + | 0 |
| <i>Rubus hillii</i> <sup>66</sup>                 | 3          | 2           | 200+88.3                 | 4.52       | 0.88        | 0.11          | 19             | 80             | 100            | 0               | 0  | 0 | + | 0 | 0  | 0 | 0 |
| <i>Rubus parvifolius</i> <sup>66</sup>            | 3          | 2           | 791+587                  | 3.22       | 0.21        | 0.13          | 19             | 100            | 92             | 0               | 0  | 0 | + | 0 | 0  | 0 | 0 |
| <i>Sarcopetalum harveyanum</i>                    | 3          | 4           | 55.7+5.17                | 35.5       | 6.16        | 5.61          | 16             | 92             | 93             | +               | +  | 0 | + | 0 | 0  | 0 | 0 |
| <i>Sarcophilus australis</i> <sup>17</sup>        | 1          | 1           | <.01                     | -          | -           | -             | -              | -              | -              | 0               | 0  | 0 | + | 0 | 0  | 0 | 0 |
| <i>Scaevola ramosissima</i> <sup>67</sup>         | 4          | 1           | 23.2+4.73                | 0.40       | 17.0        | 4.86          | 95             | 96             | 98             | 0               | 0  | 0 | 0 | + | +  | + | + |
| <i>Schelhameria undulata</i>                      | 4          | 1           | 5.14+0.988               | .222       | .307        | 5.15          | 89             | 93             | 93             | 1               | 0  | 0 | 0 | 0 | 0  | 0 | 0 |
| <i>Schizaea bifida</i> <sup>15</sup>              | 1          | 1           | <.01                     | -          | -           | -             | -              | -              | -              | 0               | 0  | 0 | 0 | + | 0  | + | + |
| <i>Schizomeria ovata</i> <sup>68</sup>            | 3          | 3           | 1514+129                 | 1068       | 222         | 15.8          | 12             | 84             | 96             | 0               | 0  | 2 | 4 | 0 | 0  | 0 | 0 |
| <i>Schoenus ericetorum</i>                        | 1          | 1           | 0.55+0.09                | -          | 0.30        | 0.31          | -              | 97             | 97             | 0               | 0  | 0 | 0 | 0 | 1  | 0 | + |
| <i>Schoenus imberbis</i>                          | 1          | 1           | 1.00+0.26                | -          | 0.65        | 0.57          | -              | 98             | 96             | 0               | 0  | 0 | 0 | + | +  | + | 0 |
| <i>Schoenus melanostachys</i>                     | 1          | 1           | .505+0.075               | -          | .343        | .203          | -              | 99             | 99             | +               | 0  | 0 | 0 | + | 0  | 0 | 0 |
| <i>Schoenus</i> sp. A                             | 4          | 1           | 2.99+0.34                | 0.52       | 1.41        | 0.89          | 94             | 98             | 98             | 0               | 0  | 0 | 0 | 0 | 0  | + | 0 |
| <i>Scutellaria mollis</i> <sup>69</sup>           | 7          | 1           | .878+0.376               | -          | .406        | .444          | -              | 95             | 99             | +               | 0  | 0 | 0 | 0 | 0  | 0 | 0 |
| <i>Senecio bipinnatisectus</i>                    | 2          | 2           | .288+0.037               | .021       | .130        | .096          | 76             | 99             | 94             | 0               | 0  | 0 | + | 0 | 0  | 0 | 0 |
| <i>Senecio minimus</i>                            | 2          | 2           | .201+0.008               | .017       | .080        | .091          | 88             | 99             | 95             | 0               | 0  | 0 | + | 0 | 0  | 0 | 0 |
| <i>Sigesbeckia orientalis</i>                     | 1          | 1           | 1.09+0.151               | -          | .561        | .553          | -              | 94             | 97             | 0               | 0  | 0 | + | 0 | 0  | 0 | 0 |
| <i>Smilax australis</i> <sup>70</sup>             | 9          | 4           | 412+67.9                 | 122        | 1.24        | 32.1          | 30             | 100            | 89             | 0               | 0  | 1 | + | 0 | 0  | 0 | 0 |
| <i>Smilax glycyphylla</i> <sup>70</sup>           | 9          | 4           | 335+39.0                 | 97.9       | 1.21        | 53.3          | 15             | 98             | 67             | +               | 0  | 0 | 0 | 0 | 0  | + | 0 |
| <i>Solanum pungetium</i> <sup>71</sup>            | 3          | 1           | 2446+291                 | 7.05       | 0.38        | 0.86          | 6              | 55             | 80             | 0               | +  | 0 | 1 | 0 | 0  | 0 | 0 |
| <i>Sowerbaea juncea</i> <sup>2</sup>              | 1          | 1           | -                        | -          | -           | -             | -              | -              | -              | 0               | 0  | 0 | 0 | 0 | 0  | 0 | + |
| <i>Stackhousia viminea</i>                        | 1          | 1           | 2.89+0.61                | -          | 1.69        | 0.94          | -              | 97             | 98             | 0               | 0  | 0 | 0 | + | 0  | + | 0 |
| <i>Stephania japonica</i>                         | 3          | 4           | 132+16.8                 | 99.4       | 13.2        | 7.55          | 21             | 87             | 94             | 0               | 0  | 0 | 1 | 0 | 0  | 0 | 0 |
| <i>Stipa rudis</i>                                | 1          | 1           | 8.31+1.06                | -          | 5.13        | 3.08          | -              | 96             | 94             | +               | 0  | 0 | 0 | 0 | 0  | 0 | 0 |
| <i>Stylidium lineare</i>                          | 1          | 1           | .121+0.023               | -          | .030        | .107          | -              | 87             | 94             | 0               | 0  | 0 | 0 | + | 1  | + | + |
| <i>Styphelia tubiflora</i> <sup>72</sup>          | 4          | 2           | 18.8+1.55                | 0.02       | 19.8        | 1.39          | 100            | 95             | 100            | 0               | 0  | 0 | 0 | 0 | +  | + | + |
| <i>Syncarpia glomulifera</i>                      | 1          | 3           | .546+0.098               | -          | .135        | .408          | -              | 97             | 98             | 12              | 8  | 9 | 4 | 0 | 0  | 0 | 0 |
| <i>Synoum glandulosum</i> <sup>73</sup>           | 3          | 3           | 1669+683                 | 718        | 8.35        | 459           | 28             | 79             | 48             | 5               | 0  | 0 | + | 0 | 0  | 0 | 0 |
| <i>Telopea speciosissima</i>                      | 2          | 3           | 71.9+11.1                | 9.35       | 8.57        | 58.6          | 96             | 94             | 97             | 0               | 0  | 0 | 0 | 0 | 0  | + | 0 |
| <i>Tetarrhena juncea</i>                          | 1          | 1           | 4.30+0.41                | -          | 1.99        | 2.08          | -              | 94             | 94             | 0               | 0  | 0 | 0 | + | 0  | + | 0 |
| <i>Tetratheca ericifolia</i>                      | 4          | 1           | 2.64+0.49                | .118       | .421        | 1.65          | 88             | 95             | 94             | 0               | 0  | 0 | 0 | + | +  | 0 | 0 |
| <i>Tetratheca shiresii</i>                        | 4          | 2           | 7.05+0.72                | 0.45       | 4.26        | 2.36          | 93             | 92             | 96             | 0               | 0  | 0 | 0 | 0 | 0  | + | + |

| Species                                  | Disp. Type | Growth form | Fresh wt of whole diaspore | Fresh wts of |             |               | Oven-dry as    |     |     | % cover at site |   |   |   |   |   |   |   |  |
|------------------------------------------|------------|-------------|----------------------------|--------------|-------------|---------------|----------------|-----|-----|-----------------|---|---|---|---|---|---|---|--|
|                                          |            |             | + s.d.                     | disp struc   | other struc | embryo & endo | % fresh wt dis | oth | e+e | 1               | 2 | 3 | 4 | 5 | 6 | 7 | 8 |  |
| <i>Thelymitra ixioides</i> <sup>18</sup> | 1          | 1           | .0015                      | -            | -           | -             | -              | -   | -   | 0               | 0 | 0 | 0 | 0 | 0 | + | + |  |
| <i>Thelymitra sp.</i> <sup>18</sup>      | 1          | 1           | .0008                      | -            | -           | -             | -              | -   | -   | 0               | 0 | 0 | 0 | 0 | + | 0 | 0 |  |
| <i>Thysanotus juncifolius</i>            | 4          | 1           | 1.05+.369                  | .175         | .448        | .570          | 97             | 96  | 97  | 0               | 0 | 0 | 0 | + | + | + | + |  |
| <i>Thysanotus tuberosus</i>              | 4          | 1           | 2.46+.102                  | .225         | .374        | 1.83          | 95             | 94  | 96  | 0               | 0 | 0 | 0 | + | 0 | 0 | 0 |  |
| <i>Tricoryne simplex</i> <sup>2</sup>    | 7          | 1           | -                          | -            | -           | -             | -              | -   | -   | 0               | 0 | 0 | 0 | 0 | 0 | 0 | + |  |
| <i>Tricostularia pauciflora</i>          | 4          | 1           | 2.02+.345                  | .405         | .883        | .833          | 96             | 98  | 98  | 0               | 0 | 0 | 0 | + | 0 | + | 0 |  |
| <i>Trochocarpa laurina</i> <sup>74</sup> | 3          | 3           | 178+49.8                   | 138          | 30.9        | 2.17          | 21             | 86  | 76  | 0               | 0 | 0 | 3 | 0 | 0 | 0 | 0 |  |
| <i>Tylophora barbata</i>                 | 2          | 4           | 14.8+0.94                  | 3.83         | 3.36        | 7.41          | 94             | 93  | 95  | 0               | 1 | 0 | + | 0 | 0 | 0 | 0 |  |
| <i>Vernonia cinerea</i>                  | 2          | 1           | .361+.017                  | .059         | .113        | .202          | 80             | 90  | 97  | +               | 0 | 0 | 0 | 0 | 0 | 0 | 0 |  |
| <i>Viola hederacea</i>                   | 4          | 1           | .781+.097                  | .070         | .213        | .452          | 91             | 92  | 98  | +               | 0 | 0 | + | 0 | 0 | 0 | 0 |  |
| <i>Wahlenbergia sp.</i>                  | 1          | 1           | .036+.003                  | -            | .016        | .018          | -              | 88  | 89  | +               | 0 | 0 | 0 | 0 | 0 | 0 | 0 |  |
| <i>Wilkiea heugliana</i>                 | 3          | 3           | 1024+497                   | 230          | 42.7        | 401           | 44             | 40  | 38  | 0               | 0 | 1 | + | 0 | 0 | 0 | 0 |  |
| <i>Woollsia pungens</i>                  | 1          | 2           | .232+.018                  | -            | .068        | .158          | -              | 100 | 99  | 0               | 0 | 0 | 0 | + | 1 | 2 | + |  |
| <i>Xanthorrhoea arborea</i>              | 1          | 2           | 15.4+1.70                  | -            | 3.97        | 12.1          | -              | 96  | 95  | 5               | 0 | 0 | 0 | 0 | 0 | + | 0 |  |
| <i>Xanthorrhoea media</i>                | 1          | 1           | 9.02+1.57                  | -            | 2.24        | 7.01          | -              | 95  | 96  | +               | 0 | 0 | 0 | 2 | 3 | + | 0 |  |
| <i>Xanthorrhoea resinosa</i>             | 1          | 1           | 11.4+1.69                  | -            | 2.50        | 9.58          | -              | 94  | 96  | 0               | 0 | 0 | 0 | 0 | 0 | 0 | 1 |  |
| <i>Xanthosia pilosa</i>                  | 4          | 1           | 1.71+.076                  | .162         | .663        | .919          | 93             | 94  | 96  | 0               | 0 | 0 | 0 | 0 | 0 | + | 0 |  |
| <i>Xanthosia tridentata</i>              | 4          | 1           | 1.58+0.17                  | 0.13         | 0.66        | 0.88          | 92             | 95  | 90  | 0               | 0 | 0 | 0 | + | 0 | + | 0 |  |
| <i>Xyris gracilis</i> <sup>75</sup>      | 7          | 1           | .148+.026                  | -            | .038        | .095          | -              | 86  | 88  | 0               | 0 | 0 | 0 | + | 0 | + | 0 |  |
| <i>Ziera laevigata</i> <sup>76</sup>     | 5          | 2           | 3.49+.861                  | .098         | 2.24        | 1.02          | 90             | 94  | 99  | 0               | 0 | 0 | 0 | 0 | + | 0 | + |  |
| <i>Ziera pilosa</i> <sup>76</sup>        | 5          | 2           | 6.69+2.04                  | .495         | 4.11        | 2.71          | 93             | 94  | 100 | 0               | 0 | 0 | 0 | 0 | 0 | + | 0 |  |
| <i>Ziera smithii</i> <sup>76</sup>       | 5          | 2           | 1.53+.242                  | .084         | .895        | .545          | 94             | 94  | 100 | 0               | + | 0 | 0 | 0 | 0 | 0 | 0 |  |

## FOOTNOTES TO APPENDIX

1. Mean of 2.8 developed seeds per diaspore (n=15). The 65.1 mg of appendage is on a per-seed basis, and consists of 63.4 mg flesh for vertebrates plus 1.7 mg suspected elaiosome.

2. Fruit not obtained.

3. The only *Baeckea* species near Sydney adapted for ant-dispersal; there are others in Western Australia. These species are in process of being separated into a separate section (W. Trudgeon, pers. comm.), with the food body serving as a diagnostic character.

4. Mean of 88.4 developed seeds per diaspore (n=5). The 16.4 mg of fleshy appendage is on a per-seed basis.

5. Contrary to Rice and Westoby (1986), in this study captive ants consistently carried seeds and removed the very small food body.

6. One developed embryo per fruit (n=20). Of the 1089 mg of appendage, 880 mg were fleshy and 209 mg woody.

7. Seeds of *Boronia*, *Eriostemon*, and *Euodia* (Rutaceae) have several structures in common. All have a propulsor for ballistic dispersal, which has not been counted as part of the diaspore. It weighed 2.58 mg for *B. ledifolia*, 1.86 mg for *B. pinnata*, 0.85 mg for *B. serrulata*, 7.58 mg for *Eriostemon australasius*, 3.52 mg for *E. buxifolius*, and 7.31 mg for *Euodia micrococca*.

Seeds have an ordinary testa and also a thin, brittle, dark brown outer coat with an opening in it. Both these layers have been counted under the category "other". Between the two layers is a soft white material attractive to ants, the layer being thickest under the opening in the outer coat. This material was counted as a food body for ants in all the species except *B. ledifolia*, where the amount was negligible. In addition there is a flap of white material covering the opening in the outer coat. This remained attached in *B. ledifolia*, *E. australasius* and *E. micrococca*, and was treated as contributing to dispersal, weighing 0.25, 1.86 and 0.21 mg respectively. In *B. pinnata*, *B. serrulata* and *E. buxifolius* the flaps appeared deciduous such that they would not be attached to seeds after ballistic dispersal, and so they were not counted as part of the ant-adaptation. These flaps weighed 0.081, 0.056 and 0.29 mg respectively.

8. The individual on the site was a seedling and could not be identified with certainty. Seed was taken from *B. acerifolium*, the likely species.

9. Material classed as other includes a light spongy tissue which could not be separated from an inner testa layer. This possibly contributes to air- resistance but we have not been able to test this, hence classified as of uncertain dispersal mode.
10. The shaft to which the air-resistant structure is attached was grouped under "other".
11. "Dispersal" category consists of 23.6 mg fleshy, 9.2 mg woody.
12. "Dispersal" category consists of 485 mg fleshy, 19 mg woody.
13. *Caustis pentandra* seeds have been found in the field outside ant nests with some of the outer covering chewed off. However this may have been attempted predation by small ants which could not get the large seeds into a nest entrance. In the lab *Rhytidoponera metallica* has not carried *Caustis* seeds away.
14. Diaspore consists of: a central portion composed of an average of 2.5 developed embryos (n=15), treated as "reserve"; a woody layer surrounding the embryos, treated as "other"; and flesh attractive to ants surrounding the woody layer, treated as "dispersal". The flesh is soft on the inside and tougher outside. Weights of components are given on a per-embryo basis. All the flesh is included as a dispersal adaptation; the softer part contributed 7.9 mg and the outer covering 2.0 mg. Reasons for believing this and other similar species are adapted for dispersal by ants rather than by vertebrates include: ants have been observed to take into their nests *Brachyloma* and *Leucopogon* spp., returning them to the soil surface with some of the flesh removed (Berg 1975 and this study); they have not been seen to be removed by vertebrates, and seem small for this purpose.
15. Fern; spores not obtained but assumed to weigh less than .01 mg, based on other ferns.
16. Fern; mean spore weight obtained by weighing 120 spores as a group; standard deviation and dissection of components not achievable.
17. Orchid; seeds not obtained but assumed to weigh less than .01 mg, based on other orchids.
18. Orchid; mean seed weight based on weighing 20 seeds as a group; standard deviation and dissection of components not possible.
19. *Ceratopetalum* species sometimes had >1 developed ovule per diaspore; means were 1.2 (n=30) for *C. apetalum* and 1.1 (n=30) for *C. gummiferum*. Dissection data are from diaspores with only one ovule.
20. The diaspore has an outer flesh attractive to vertebrates, and in addition each seed within this flesh has a pink food body at one end. We have provisionally classified it as dispersed by both vertebrates and ants because ants respond after the flesh has been removed. However we do not yet know whether the pink food body survives passing through a vertebrate. Mean 2.4 seeds per diaspore (n=26); component weights given on a per-seed basis; "dispersal" consists of 295 mg flesh for vertebrates and 2.9 mg food body, per seed. Oven-dry weights are 16% and 93% of these components respectively.
21. Seeds have a considerable indentation in which a substantial proportion of the ant-rewarding food body is found; the remainder is on the surface of the seed. Data given are for individual seeds. Seeds lie within a fleshy enclosing fruit, but we provisionally believe this flesh provides photosynthate rather than dispersal by vertebrates. On average there are 3.6 seeds per fruit (n=25), and whole fruits weighed 133±53 mg fresh (n=5). The fleshy material weighed 9% as much oven-dry as fresh.
22. Mean 2.4 seeds per diaspore (n=28). Weights of components given on a per-seed basis.
23. Mean 2.7 seeds per diaspore (n=42). Weights of components given on a per-seed basis.
24. General organization similar to *Brachyloma* (see note 14).
25. "Dispersal" consists of 110 mg thick outer skin, 85 mg juicy flesh, 20 mg fibrous material around seed.
26. Mean 5.2±3.5 seeds per diaspore (n=30). Weights of components on a per- seed basis.
27. Ballistic propulsors, mean weight 6.7±0.9 mg (n=5), not included. About half the diaspores examined consisted of an elaiosome attached to a seed, component weights reflect this situation; other half consist of two seeds attached to one elaiosome.
28. Ballistic propulsors, mean weight 4.7±0.4 mg (n=5) not included. Food body consists of a soft brown coating over entire seed (1.03 mg), an elaboration of this into a "plug" at one place (0.47 mg), and a flap of white tissue over this (0.53 mg).
29. "Dispersal" includes flesh and outer skin. "Other" includes testa (5.7 mg in *C. glaucescens* and 23.8 mg in *C. microneura*) and a fibrous coating (205 mg in *C.*

- glaucescens* and 643 mg in *C. microneura*). A test for *C. glaucescens* showed this fibrous coating remained after flesh was digested away in a bird gut.
30. Only 2 seeds obtained.
  31. The dispersal device is the capsule with hooks which adhere to animal fur or feathers. There is one seed per capsule.
  32. Mean 4.6 seeds per fruit (n=30); weight of flesh for dispersal given on a per-seed basis.
  33. Mean 1.0 developed embryos per fruit.
  34. "Other" is predominantly a spongy-woody layer. This may serve for wind or water dispersal but has not been shown to do so.
  35. Mean seed weight based on weighing 20 as a group; standard deviation and dissections not possible.
  36. "Other" includes both testa (7.7 mg, oven-dry 98% of fresh weight) and a woody layer inside the flesh (514 mg, oven-dry 81% of fresh weight). There were two embryos in the dissected fruit, but we believe only one of these would be able to establish and so components are not given on a per-embryo basis. Mean 1.6 developed embryos per fruit (n=20).
  37. Only one mature seed found therefore no standard deviation.
  38. Seeds are arrayed in groups of 1-3 within a small amount of skin (this is included on a per-seed basis under "other"). These groups are arranged on a receptacle which has quite high water content (oven-dry 20% of fresh), but we do not know whether it is attractive to vertebrates, hence dispersal mode called unknown. The whole fruit has  $52.6 \pm 5.8$  seeds (n=5) and fresh weight  $2881 \pm 600$  mg (n=12).
  39. Mean seeds per fruit  $5.0 \pm 2.3$  (n=40); flesh given on a per-seed basis.
  40. Mean seeds per fruit  $5.0 \pm 2.4$  (n=8). Flesh for dispersal given on a per-seed basis. These fruits were green and possibly underripe, which may account for the high water content of embryo and endosperm.
  41. "Other" includes some woody parts and a jelly-like material in a compartment of the wood; "dispersal" includes the outer flesh. Fruits have either 1 or 2 developed embryos (mean 1.2, n=30); the fruit dissected had one.
  42. Two locules but a maximum of one developed embryo per fruit (n=30).
  43. Mean  $1.85 \pm 0.81$  developed embryos per fruit (n=20); two in the fruit for which component weights are given. There was 47% weight loss after dissection before fresh weights could be measured.
  44. Mean 1.6 developed embryos per fruit (n=20); two in the fruit for which component weights are given. There was 55% weight loss after dissection before component fresh weights could be measured.
  45. Mean 1.25 embryos per fruit (n=20); two in the fruit dissected.
  46. Mean 1.5 developed seeds per fruit (n=37); fruit dissected had one seed.
  47. Mean 1.1 developed seeds per fruit (n=30); fruit dissected had one seed.
  48. In *Lomandra* the ant-rewarding food body is a webbing of oily tissue over the surface. This had to be scraped off. In this species the tissue between the food body and the embryo/endosperm was unavoidably scraped off at the same time, and appears with the food body.
  49. A thin testa or epithelial layer adhered closely to the embryo and endosperm and is included with it.
  50. Only one developed embryo per fruit (n=15), but considerable weight loss on dissection before components could be weighed.
  51. Mean 14.9 seeds per fruit (n=30); flesh for dispersal given on a per-seed basis.
  52. "Dispersal" includes an outer fleshy layer (57 mg fresh, 43 mg oven-dry) and an inner fibrous layer (23 mg fresh, 19 mg oven-dry).
  53. Ballistic propulsors not included, weighed  $0.075 \pm 0.012$  mg fresh (n=5), 0.070 mg oven-dry in *O. chnoodes*,  $0.069 \pm 0.023$  mg fresh (n=5). 0.062 mg oven-dry in *O. exilis*.
  54. Mean 94.8 seeds per fruit (n=5), contained within a matrix of flesh within a leathery skin. "Dispersal" given on a per-seed basis, skin contributed 156 mg fresh, 27.3 mg oven-dry; flesh contributed 125 mg fresh, 17.6 mg oven-dry.
  55. *Persoonia levis* averaged 1.4 developed embryos per fruit (n=30) and *P. linearis* averaged 1.35 (n=20). The other species consistently had one embryo per fruit. We have assumed that where there is more than one embryo, only one would establish.
  56. Ballistic propulsor, mean dry weight 0.89 mg, not included.
  57. Ballistic propulsor, mean dry weight 2.74 mg, not included. Ant-rewarding food body includes soft material in a pocket (0.29 mg) and a flap over this (0.28 mg).
  58. Ballistic propulsor, mean dry weight 0.852 mg, not included.
  59. (Footnote deleted).



60. *Pittosporum* capsules open presenting seeds embedded in a viscid material on the inner surface. Birds take the seeds for this material, but seeds extracted from bird faeces still are coated with enough of it that ants carry them away. The quantity of material is given on a per-seed basis.
61. Average of 1.55 developed seeds per fruit (n=20); the fruit dissected for components had two; weight of flesh for dispersal given on a per-seed basis.
62. Ballistic propulsor not included, mean dry weight 0.29 mg.
63. Ballistic propulsor not included, mean dry weight 0.05 mg.
64. Average of 1.5 developed seeds per fruit (n=15); the fruit dissected for components had two; weight of flesh for dispersal given on a per-seed basis.
65. Fruit possibly not completely mature, accounting for large weight loss from embryo on drying.
66. Mean number of drupels per fruit 25.6 for *Rubus hillii* (n=8) and 201 for *R. parvifolius* (n=5). Weights of components are given on a per-seed basis. "Dispersal" includes both the receptacle (1.80 mg drying to 0.38 mg in *R. hillii*, 0.84 mg drying to 0.23 mg in *R. parvifolius*) and the flesh of each drupel (2.72 drying to 0.47 mg in *R. hillii*, 2.38 mg drying to 0.38 mg in *R. parvifolius*).
67. Mean 1.53 developed embryos per fruit (n=17). Believed that only one of these would establish, so component weights given on a per-fruit basis, for a fruit with two developed embryos.
68. Mean 1.5 developed embryos per fruit (n=30), two in the fruit dissected, both within one woody carpel. We have assumed only one would establish, so component weights are given on a per-fruit basis.
69. "Other" includes a papery outer coat which may be an ant-rewarding food body (.077 mg oven-dry), as well as a testa (0.309 mg oven-dry).
70. In *Smilax* seeds are within a flesh for vertebrates, and in addition each seed has an ant-rewarding food body. We are not sure whether these food bodies would survive passage through a bird's gut. *S. australis* averages 2.3 developed seeds per fruit (n=15) and *S. glycyphylla* averages 1.8 (n=26). Flesh is given on a per-seed basis. "Dispersal" in *S. australis* is made up of 122 mg of flesh drying to 36.8 mg, plus 0.25 mg of food body drying to 0.22 mg; in *S. glycyphylla* flesh contributes 97.6 mg drying to 14.4 mg, the food body 0.30 mg drying to 0.28 mg.
71. Mean 270 seeds per fruit (n=5); flesh for dispersal given on a per-seed basis.
72. Tentatively classified as ant-dispersed on the grounds that *Rhytidoponera* carried seeds into their nest and subsequently returned them alive to the surface. However it should be noted that no parts appeared to have been excised. The material presumed to be a food body is a small ring of tissue around one end of the capsule. Fruits averaged 1.6 developed embryos (n=10); we believe only one could establish. There were two in the fruit dissected.
73. *Synoum* has two seeds attached each side of a central aril; aril component is given on a per-seed basis.
74. Mean of 3.2 developed embryos per fruit (n=24); four in the fruit dissected. These are all within the single woody coat, and we believe only one would establish.
75. "Other" includes a small yellow oily appendage, weighing .002 mg fresh. We do not know whether this acts as a reward for ants, so the species has been classed as of uncertain dispersal mode.
76. Ballistic propulsors not included; their dry weights were  $1.25 \pm 0.23$  mg for *Ziera laevigata*,  $1.79 \pm 0.46$  mg for *Z. pilosa*, and  $0.62 \pm 0.08$  mg for *Z. smithii*; n=5 in all cases.
77. *Lastraeopsis decomposita* and *L. microsora* can only be distinguished with a microscope; at site 3 the joint cover of both of them was attributed to *L. decomposita*.
